# Supplementary material
Source: PubMed Central journal article supplement (PMC5286568)
Supplement: NIHMS818413-supplement-1.pdf [file NIHMS818413-supplement-1.pdf]

## Activation of Dioxygen by a TAML Activator in Reverse Micelles:

### Characterization of an Fe<sup>III</sup>Fe<sup>IV</sup> Dimer and Associated Catalytic Chemistry

Liang L. Tang, William A. Gunderson, Andrew C. Weitz, Michael P. Hendrich,\* Alexander D. Ryabov\* and Terrence J. Collins\*

*Department of Chemistry, Carnegie Mellon University, 4400 Fifth Avenue, Pittsburgh, Pennsylvania 15213, United States*

---

## Supporting Information

### Experimental Details

#### *Methods*

*NADH and NAD<sup>+</sup> analysis by HPLC.* The 250×4.6 mm Agilent Microsorb-MV 100 C18 column was used for NADH and NAD<sup>+</sup> analysis.

Method 1. Two eluents were employed which is a simplified method of method 2. Eluent A was a 0.05 M potassium phosphate buffer, pH 6.0; eluent B was a mixture v/v of 60% A and 40% MeOH. The temperature was maintained at 40 °C across the column. The gradients used as described elsewhere<sup>1</sup> are shown in Table S1. The flow rate was constant 1.0 mL/min.

Method 2. The HPLC utilized four eluents. Eluent A was a 0.05 M potassium phosphate buffer, pH 6.0; eluent B was a mixture v/v of 60% A and 40% MeOH; eluent C was 100% MeOH; eluent D was HPLC grade water. The temperature was maintained at 40 °C across the column. The gradient used is shown in Table S2.<sup>1</sup> The flow rate was constant 1.0 mL/min.

The extraction of products from the reverse micelles was initiated by addition of 2 mL water to 2 mL reaction mixtures. After vigorous shaking, the emulsion was centrifuged at 8000 rpm for 10

min using an Eppendorf minispin centrifuge. The aqueous bottom phase was removed by a glass pipet and analyzed.

### ***Procedures***

For the reaction of **2a** with NADH in the absence of oxygen, the “freeze-pump-thaw” method was applied. A mixture of unpurified AOT in *n*-octane (19.75 mL, 0.1 M), NADH in water (100  $\mu$ L, 0.04 M) and pH 12 buffer (150  $\mu$ L,  $w_0$  7) in a 50 mL Schlenk flask was degassed three times (solution A). Solution A (1.5 mL) was added to a capped quartz cuvette containing 1.5 mL methanol and shaken fiercely. Two transparent layers formed after standing and the UV-vis spectrum of the lower layer (methanol) was measured. The methanol layer was further used for HPLC measurement (1 mL water was added to 1 mL methanol solution to prepare the HPLC sample). Compound **2a** (6.37 mg,  $4 \times 10^{-6}$  mol) in a 5 mL two-necked round bottom flask was degassed and degassed acetonitrile (500  $\mu$ L) was added. The solution of **2a** (231  $\mu$ L) was added to solution A and stirred for 20 min. The color of the mixture turned from light brown to light yellow and 1.5 mL was added to methanol (1.5 mL) for UV-vis measurements. Methanol was used because **2a** turns back to **1a** within 1 min in this solvent.<sup>2</sup> For the experiment with **1a**, similar procedure was used. Unpurified AOT in *n*-octane (9.875 mL 0.1 M), NADH in water (50  $\mu$ L 0.04 M), pH 12 buffer (25  $\mu$ L) and acetonitrile (125  $\mu$ L) in a 25 mL Schlenk flask were degassed three times (solution B). Compound **1a** (9.3 mg,  $2 \times 10^{-5}$  mol) dissolved in pH 12 buffer (500  $\mu$ L) was degassed. Compound **1a** (50  $\mu$ L) was then added to solution B ( $w_0$  7). Table S3 shows the results of the experiments obtained by HPLC method 2.

**Table S1.** HPLC Method 1 eluent gradient for the analysis of NADH and NAD<sup>+</sup>.

| Time (min)* | % Eluent A** | % Eluent B*** |
|-------------|--------------|---------------|
| 0.0         | 100          | 0             |
| 4.0         | 100          | 0             |
| 5.0         | 98.5         | 1.5           |
| 10.0        | 96.5         | 3.5           |
| 15.0        | 96.5         | 3.5           |
| 15.1        | 75           | 25            |
| 30.0        | 75           | 25            |
| 32.0        | 100          | 0             |
| 35.0        | 100          | 0             |

\*The flow rate was constant 1.0 mL/min.

\*\*Eluent A is 0.05 M phosphate buffer, pH 6.0.

\*\*\*Eluent B is 60:40 v/v A: MeOH.

**Table S2.** HPLC Method 2 eluent gradient for the analysis of NADH and NAD<sup>+</sup>.

| Time (min)* | % Eluent A** | % Eluent B*** | % Eluent C**** | % Water |
|-------------|--------------|---------------|----------------|---------|
| 0.0         | 100          | 0             | 0              | 0       |
| 9.0         | 100          | 0             | 0              | 0       |
| 10.0        | 98.5         | 1.5           | 0              | 0       |
| 15.0        | 96.5         | 3.5           | 0              | 0       |
| 20.0        | 96.5         | 3.5           | 0              | 0       |
| 20.1        | 75           | 25            | 0              | 0       |
| 28.0        | 75           | 25            | 0              | 0       |
| 29.0        | 0            | 0             | 100            | 0       |
| 40.0        | 0            | 0             | 100            | 0       |
| 45.0        | 0            | 0             | 0              | 100     |
| 50.0        | 100          | 0             | 0              | 0       |
| 55.0        | 100          | 0             | 0              | 0       |

\*The flow rate was constant 1.0 mL/min.

\*\*Eluent A is 0.05 M phosphate buffer, pH 6.0.

\*\*\*Eluent B is 60:40 v/v A: MeOH.

\*\*\*\*Eluent C is 100% MeOH.

**Table S3.** Results of HPLC study of reactions of NADH ( $2.1 \times 10^{-4}$  M) with iron(III) (**1a**) and iron(IV) (**2a**) species (both  $2.0 \times 10^{-4}$  M with respect to a monomeric form) in the reverse micelles at  $w_0$  7 and pH 12.

| Iron Species | Amount with respected to added NADH / % |      | Yield of NAD <sup>+</sup> with respect to total iron / % | Conditions                                              |
|--------------|-----------------------------------------|------|----------------------------------------------------------|---------------------------------------------------------|
|              | NAD <sup>+</sup>                        | NADH |                                                          |                                                         |
| None         | 0                                       | 100  | 0                                                        | Solution A                                              |
| <b>2a</b>    | 25                                      | 70   | 52                                                       | Reaction time 20 min                                    |
| <b>2a</b>    | 85                                      | 0    | 180                                                      | After exposure to air for 15 min following the reaction |
| <b>1a</b>    | 7                                       | 82   | 14                                                       | Reaction time 20 min                                    |
| <b>1a</b>    | 63                                      | 1    | 132                                                      | After exposure to air for 15 min following the reaction |

**Table S4.** Comparison of the efficacy of catalysis by **1a** in oxidation of Pinacyanol chloride (PNC) ( $4.5 \times 10^{-5}$  M) by O<sub>2</sub> in reverse micelles under different conditions at 25 °C.

| $w_0$ | $10^7 \times [\mathbf{1a}]/\text{M}$ | Time/h | PNC bleached as measured at 600 nm / % |                     |                     |
|-------|--------------------------------------|--------|----------------------------------------|---------------------|---------------------|
|       |                                      |        | pH 8                                   | pH 10               | pH 12               |
|       |                                      |        | With/without <b>1a</b>                 |                     |                     |
|       | 5                                    | 48     | 44/11                                  | 43/11               | 67/8                |
| 3     | 12.5                                 | 16     | 51/5                                   | 46/5                | 64/4                |
|       | 50                                   | 3      | 24/0.2                                 | 8/0.3               | 22/0.1              |
|       | 5                                    | 16     | 62/5                                   | 84/9                | 100/5               |
| 10    | 12.5                                 | 3      | 37/1                                   | 66/1                | 95/1                |
|       | 50                                   | 3      | 96/1                                   | 97/1                | 97/1                |
|       | 5                                    | 48     | 42/10                                  | 82 <sup>*</sup> /24 | 100 <sup>*</sup> /6 |
| 25    | 12.5                                 | 16     | 13/3                                   | 40/4                | 99 <sup>*</sup> /2  |
|       | 50                                   | 3      | 22/2                                   | 43/1                | 39/1                |

\* A gradual change of color was observed in the cuvette and a darker color was at the bottom (no precipitate observed) which is supposed to be attributed to the instability of the reverse micelle system.

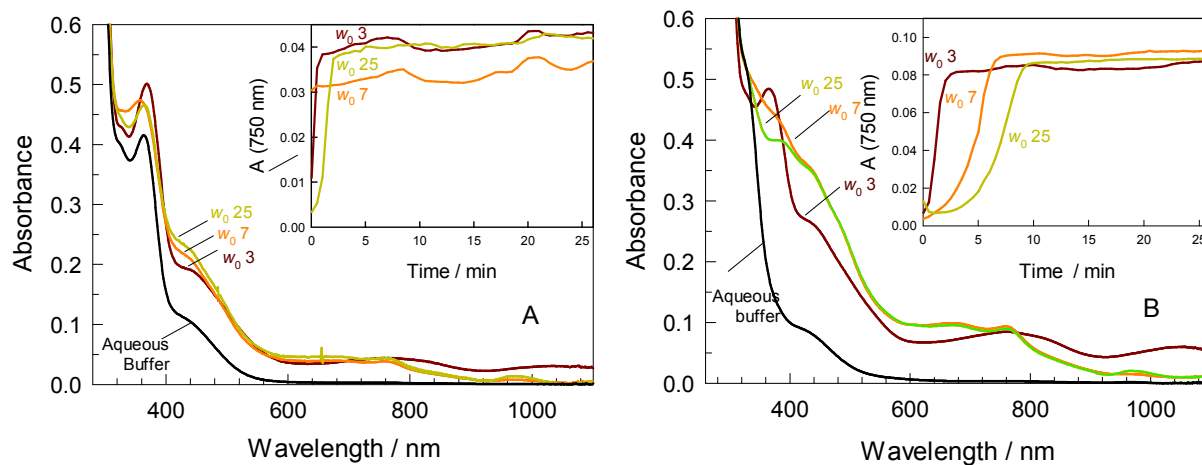

**Figure S1.** Spectra of **1a** in the AOT reverse micelles in *n*-octane recorded 20 min after mixing all components. The spectrum of **1a** in the aqueous buffer (bottom) is shown for comparison. Conditions: [**1a**]  $1.36 \times 10^{-4}$  M, pH 10 (**A**) and 12 (**B**),  $w_0 = 3, 7$  and 25; 25 °C. Inset shows changes of absorbance at 750 nm with time at different  $w_0$ .

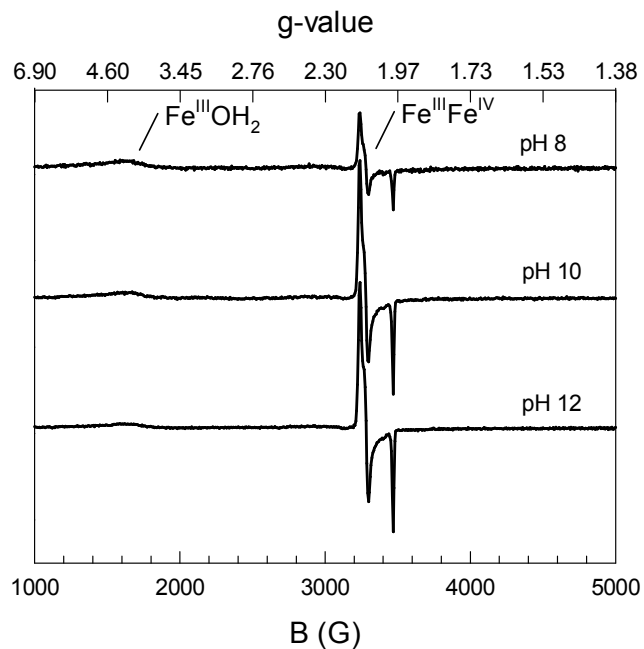

**Figure S2.** EPR spectra of **1a** in reverse micelles,  $w_0$  10 at different pHs. Total iron  $1.53 \times 10^{-4}$  M. Measured concentrations of  $\text{Fe}^{\text{III}}\text{Fe}^{\text{IV}}$  as dimer are  $1.0 \times 10^{-5}$  M,  $2.5 \times 10^{-5}$  M and  $2.8 \times 10^{-5}$  M at pH 8, 10 and 12, respectively.



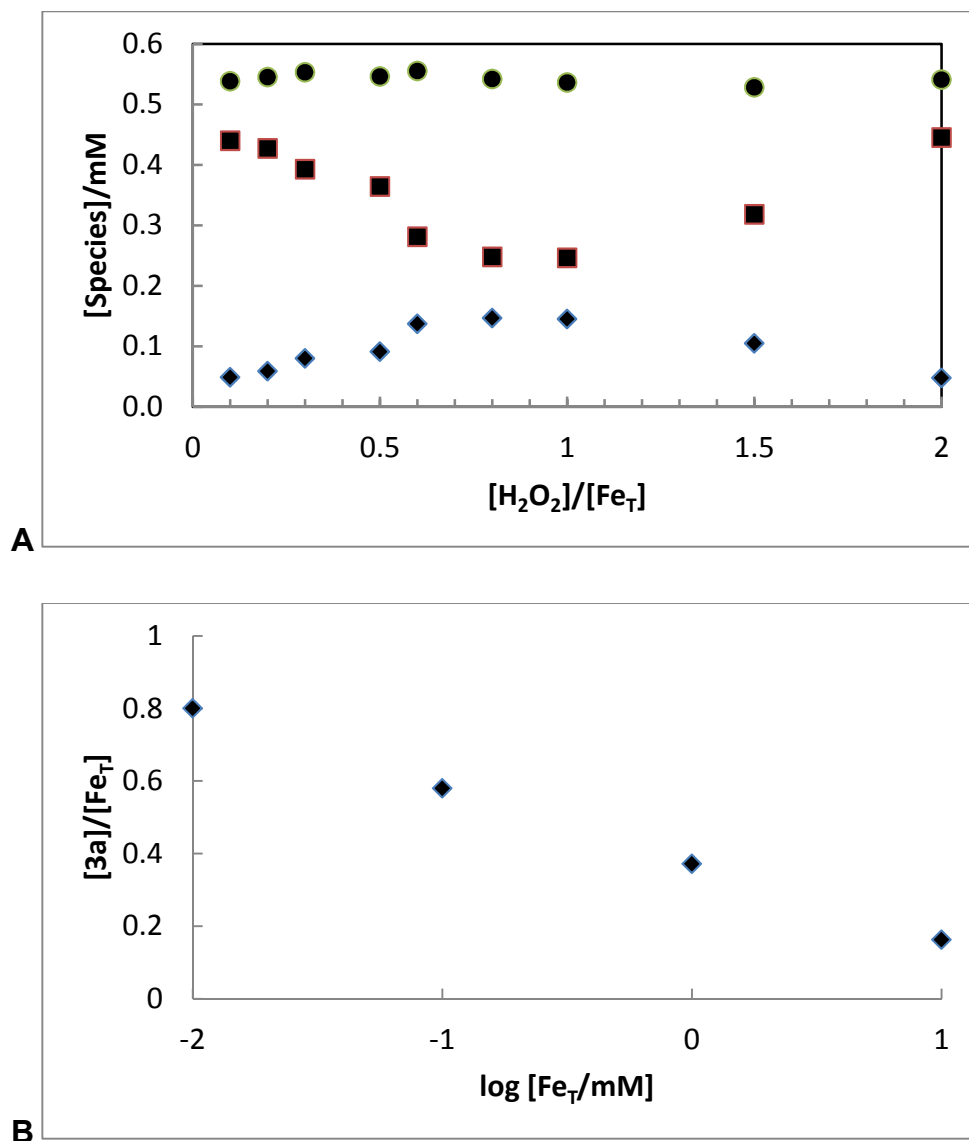

**Figure S3.** (A) Species concentrations of **1a** (■), **3a** (◆), and total Fe associated with both species (●) observed in EPR samples as a function of  $H_2O_2$  added to 1 mM **1a**. (B) Concentration of **3a** after addition of 1 eq  $H_2O_2$  to **1a** as a function of total Fe in the sample. All samples prepared in 50% glycerol, pH 11.8 (0.01 M phosphate) at  $-20\text{ }^\circ\text{C}$ .

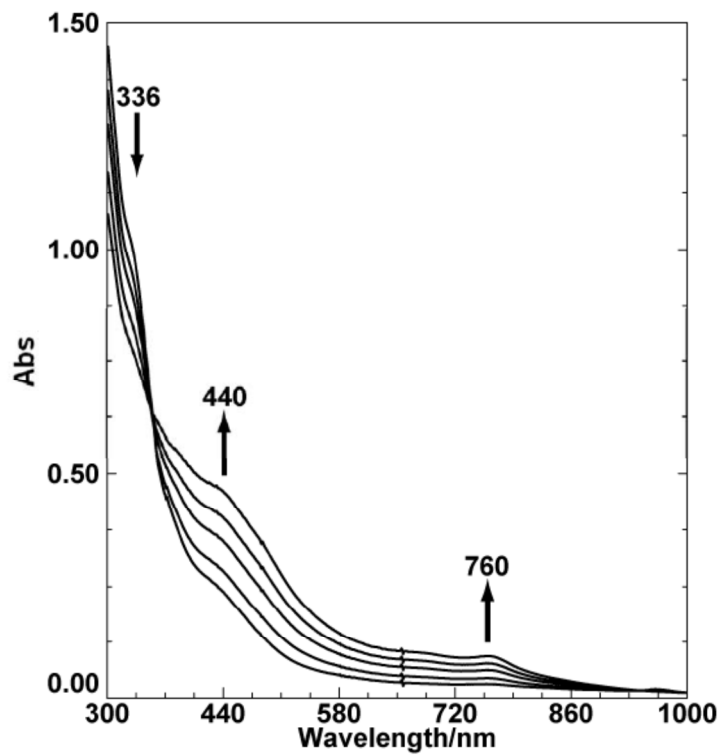

**Figure S4.** Absorption spectra of **3a** as formed from **1a** + H<sub>2</sub>O<sub>2</sub>. The spectra are shown for additions of 0.2, 0.4, 0.6 and 0.8 eqs of H<sub>2</sub>O<sub>2</sub>. The absorption bands at 440 and 760 nm grow with each addition, while the band from **1a** at 336 nm decreases in intensity.

### *Determination of Exchange Coupling*

The EPR spectrum of **3a** was recorded at temperatures between 2 and 46 K. At each temperature the spectrum was recorded with a series of powers from 2  $\mu$ W to 455 mW. The peak-to-peak signal intensity of the resonance at  $g = 2.111$  as a function of microwave power was fitted to Eq. S1 to determine the power at half saturation,  $P_{1/2}$ , where  $D$  is the value of signal/ $P_{1/2}$  for non-saturating (low) powers.

$$S/\sqrt{P} = D/(1 + P/P_{1/2})^{1/2} \quad (\text{S1})$$

$$P_{1/2} = AT + BT^n + C[\exp(\Delta/T) - 1]^{-1} \quad (\text{S2})$$

A plot of  $P_{1/2}$  vs.  $T$  is shown in Fig. S5. Under the assumption that  $P_{1/2}$  is proportional to the spin-lattice relaxation time, the power saturation contains terms for three relaxation processes: Direct, Raman and Orbach, respectively, which are fit with eq S2.<sup>3</sup> The energy of the first excited doublet relative to the ground doublet is  $\Delta$ , and for Kramers systems  $n = 9$ . The constants  $A$ ,  $B$ ,  $C$ , and  $\Delta$  are determined by least-squares fit to the data of Fig. S5. A fit to the data is shown in Fig. S5 for  $\Delta = 90 \pm 30 \text{ cm}^{-1}$  with additional fitting parameters given in the figure caption. The dashed line is a least-squares fit to the data with only the Direct and Raman terms; the poor fit indicates that the Orbach term is required.

To calculate the exchange coupling,  $J$ , we assume that the spin state for each iron site in **3a** is  $S_3 = 3/2$  ( $\text{Fe}^{\text{III}}$ ) and  $S_4 = 1$  ( $\text{Fe}^{\text{IV}}$ ), which was established by the Mössbauer data in Figure 5. The splitting  $\Delta$  between the  $S = 1/2$  and  $S = 3/2$  spin manifolds is  $\Delta = -3J$  ( $-2J\mathbf{S}_1 \cdot \mathbf{S}_2$ ), which gives  $J = -30 \pm 10 \text{ cm}^{-1}$ .

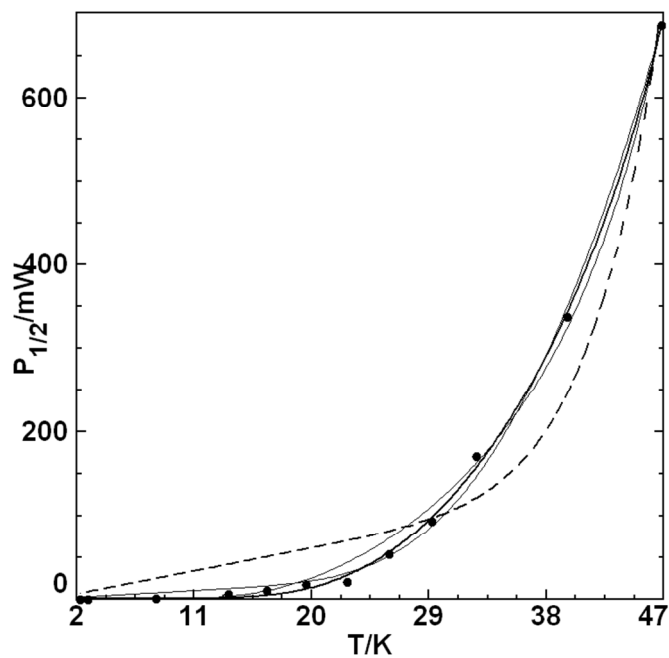

**Figure S5.** A plot of  $P_{1/2}$  vs.  $T$  for the power saturation of **3a**. The fit to eq S1 (solid line) uses  $A = 5.7 \times 10^{-2}$  mW/K,  $B = 1.771 \times 10^{-13}$  mW/K,  $C = 7.2 \times 10^3$  mW,  $\Delta = 126$  K. The two thin lines are for  $\Delta = 180$  K and 70 K. The dashed line is a fit without the Orbach relaxation term.

### *Alternate Formation of 3a*

The formation of complex **3a** from **2a** was examined. Complex **2a** was dissolved in CH<sub>3</sub>CN and an amount of this solution was added to the phosphate buffer (pH 11.8) containing 50% glycerol to give a solution with 20% CH<sub>3</sub>CN. This mixture was transferred to an EPR tube and frozen. The EPR spectrum of this sample in the  $g = 2$  region is identical to that of **3a** in Figure 3. No other EPR signals were present. Quantitation of the signal indicated 20% of the total Fe in the sample was **3a**. This is consistent with previous studies at pH 11.7 showing that **2a** converts to a mixture of predominately complexes Fe<sup>IV</sup>Fe<sup>IV</sup> and Fe<sup>IV</sup>O.<sup>2,4</sup>

The reduction of **2a** was also attempted with decamethylferrocene, [Fe(Cp\*)<sub>2</sub>]. An EPR sample was prepared by addition of 4 eq of [Fe(Cp\*)<sub>2</sub>] to a solution of **2a** in CH<sub>3</sub>CN. The EPR spectrum of this sample displays two signals: the  $S = \frac{1}{2}$  signal of **3a**, and the  $S = \frac{3}{2}$  signal of **1a**. The quantitation of the signals indicated that 35% and 20% of the Fe was converted to **3a** and **1a**, respectively. While we cannot presently account for the remaining Fe, this experiment demonstrates that **3a** can be produced from **2a** in the presence of a reductant.

The formation of **3a** from Fe<sup>IV</sup>O was attempted at pH 13. First, Fe<sup>IV</sup>O was prepared as previously reported, with the addition of 0.5 eq of *t*-BuOOH to **1a** at pH 13.<sup>4</sup> This sample produced an electronic absorption spectrum identical to that of Fe<sup>IV</sup>O. To this solution, 1 eq of **1a** was added. The resulting absorption spectrum was composed of a sum of the spectra of complexes **1a** and Fe<sup>IV</sup>O. In particular, the absorption from **3a** at 760 nm was not present. The spectrum did not change over the course of 1 h, indicating that there is no reaction between **1a** and Fe<sup>IV</sup>O at pH 13.

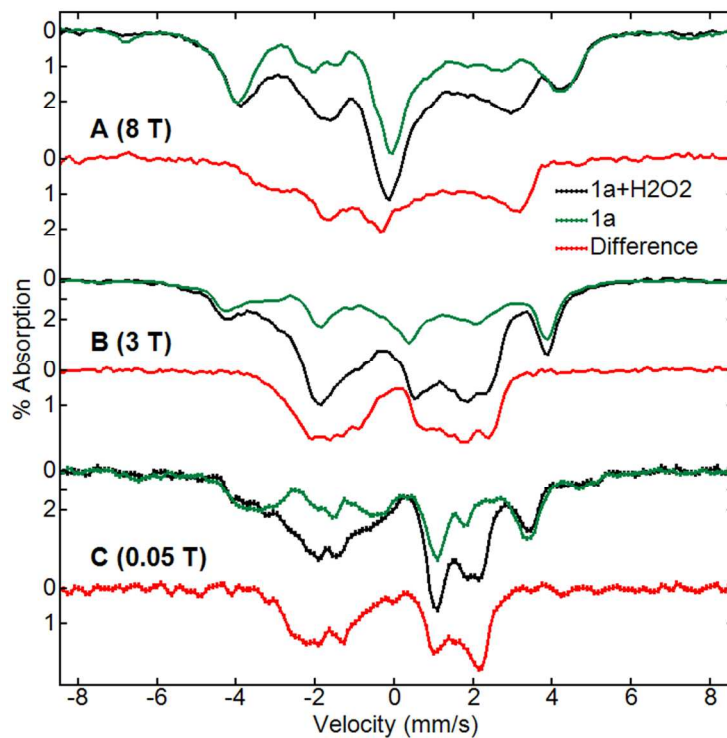

**Figure S6.** Mössbauer spectra of **1a** (black lines), **1a** + 1 eq. H<sub>2</sub>O<sub>2</sub>, and **3a** (difference, red lines) in pH 11.8 buffer, 50% glycerol, recorded at 4.2 K with an applied field of 8 T (A), 3 T (B) and 0.05 T (C). The difference spectra (also shown in Figure 6) are after subtraction of 45% of the area the corresponding spectra of **1a**.

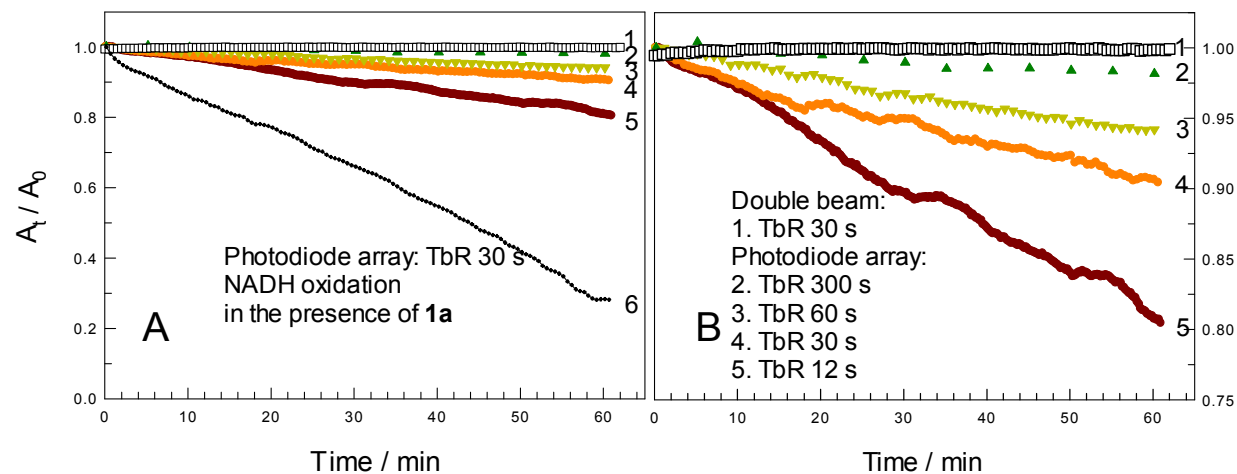

**Figure S7. A.** Kinetic curves for NADH oxidation in both the absence and presence of **1a** registered with both double beam (Curve 1) and photodiode array instrument (Curves 2-6) applying different pulse frequencies for the latter instrument. An NADH degradation curve (6) in the presence of **1a** was shown for comparison in S7A. **B.** Y axis zoom for the five runs of A in which **1a** was absent (Curves 1-5). TbR is the time between recording successive spectra. Other conditions: pH 10,  $w_0$  10,  $[\text{NADH}] 5.14 \times 10^{-5}$  M.

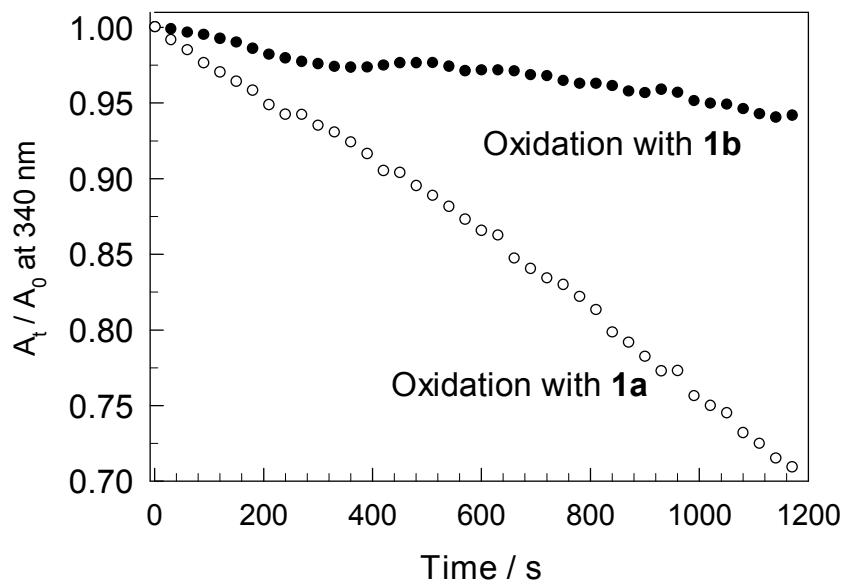

**Figure S8.** Changes of absorbance of NADH at 340 nm during **1a**- and **1b**-catalyzed oxidation of NADH by O<sub>2</sub> at pH 10 and  $w_0$  3. Conditions: **1a**-catalyzed NADH oxidation: [NADH]  $5.16 \times 10^{-5}$  M, [**1a**]  $2.47 \times 10^{-6}$  M; **1b**-catalyzed NADH oxidation: [NADH]  $5.16 \times 10^{-5}$  M, [**1b**]  $2.45 \times 10^{-6}$  M.



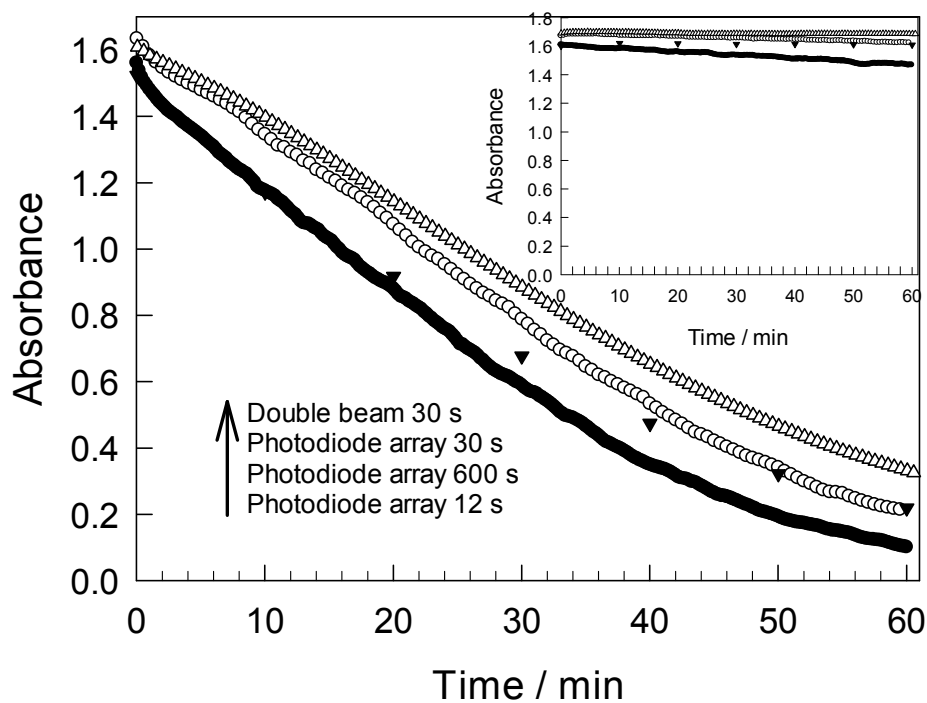

**Figure S9.** Catalyzed Pinacyanol chloride (PNC) oxidation by **1a** applying different pulse frequencies using photodiode array and double beam spectrometer. Conditions: pH 10,  $w_0$  10,  $[\text{PNC}] = 2.71 \times 10^{-5} \text{ M}$ ,  $[\mathbf{1a}] = 1.52 \times 10^{-6} \text{ M}$ . Inset: PNC oxidation in the absence of **1a**. Time between recordings of successive spectra is 12, 30 and 600 s.

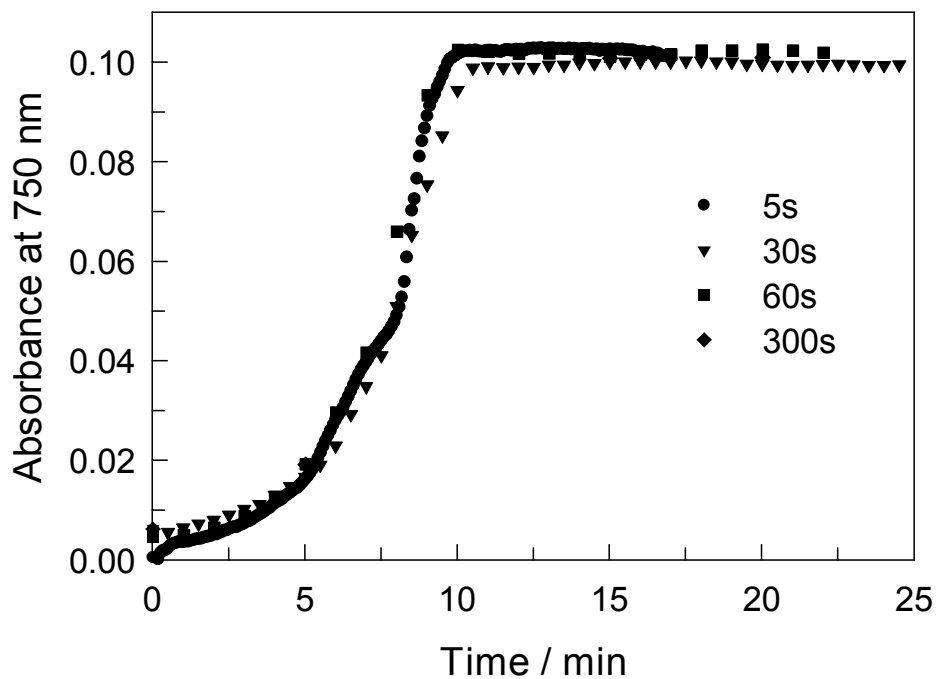

**Figure S10.** Absorbance change of **1a** at 750 nm applying different TbR (time between recordings of successive spectra) in the reverse micelles. Conditions: pH 12,  $w_0$  15,  $[1a] = 1.36 \times 10^{-4}$  M. Spectra were recorded every 5 s, 30 s, 60 s and 300 s using photodiode array UV-vis.

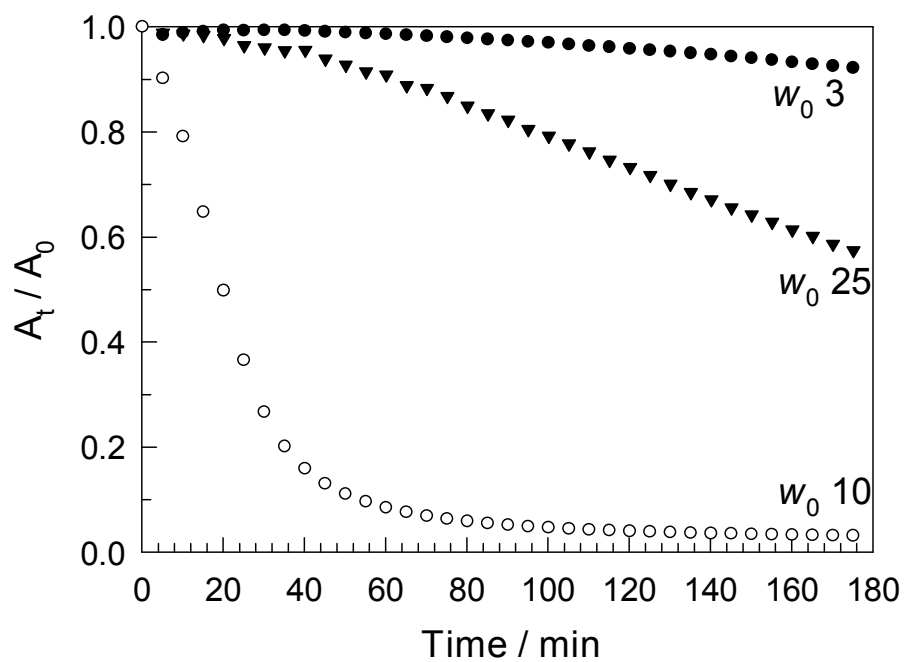

**Figure S11.** Changes of percentage of PNC during **1a**-catalyzed bleaching of PNC by O<sub>2</sub> at pH 10 and variable  $w_0$  (3, 10 and 25) calculated by absorbance of PNC at 600 nm. Conditions: [PNC]  $4.5 \times 10^{-5}$  M, [**1a**]  $5.0 \times 10^{-6}$  M.

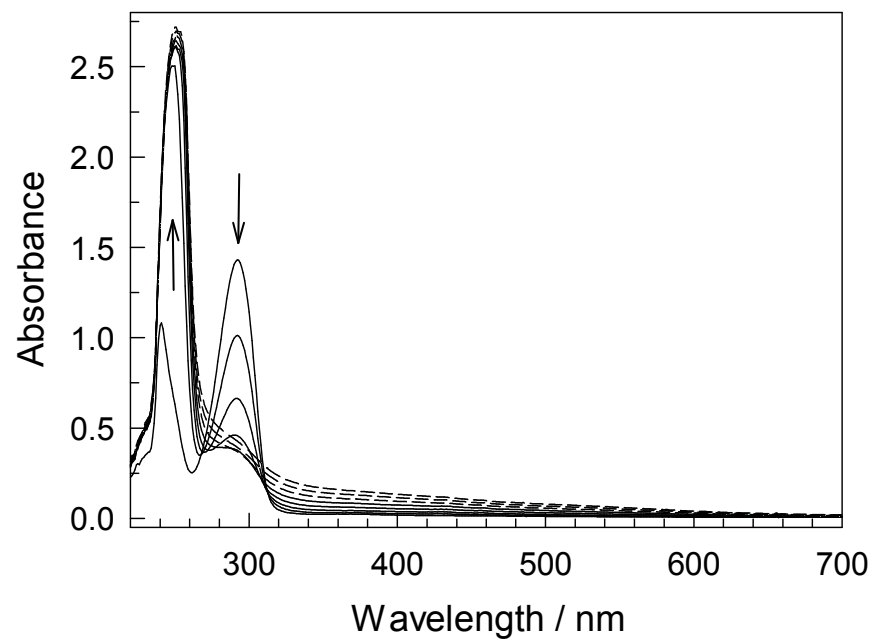

**Figure S12.** Spectral changes that accompany **1a**-catalyzed oxidation of hydroquinone by O<sub>2</sub>. Conditions: [HQ] 6.0×10<sup>-4</sup> M, [**1a**] 2.5×10<sup>-6</sup> M, *w*<sub>0</sub> 10, pH 10, spectra were recorded every 100 min. Solid and dash lines show the primary and secondary oxidative processes, respectively.

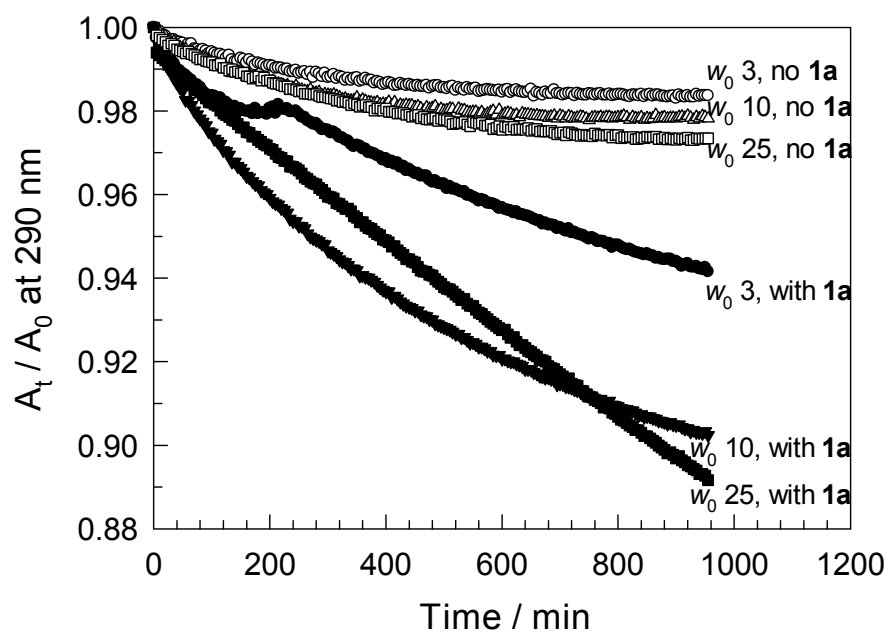

**Figure S13.** Hydroquinone oxidation under different conditions. Conditions: pH 8, [HQ]  $6.0 \times 10^{-4}$  M, [**1a**]  $2.5 \times 10^{-6}$  M,  $w_0$  3, 10, 25.

## References

- (1) Markham, K. A.; Kohen, A. *Curr. Anal. Chem.* **2006**, *2*, 379-388.
- (2) Ghosh, A.; Tiago de Oliveria, F.; Toshihiro Yano, T.; Nishioka, T.; Beach, E. S.; Kinoshita, I.; Münck, E.; Ryabov, A. D.; Horwits, C. P.; Collins, T. J. *J. Am. Chem. Soc.* **2005**, *127*, 2505-2513.
- (3) Abragam, A.; Bleaney, B. *Electron Paramagnetic Resonance of Transition Ions (International Series of Monographs on Physics)*; Oxford Univ. Press: New York, 1970.
- (4) Chanda, A.; Shan, X.; Chakrabarti, M.; Ellis, W.; Popescu, D.; Tiago de Oliveria, F.; Wang, D.; Que, L., Jr.; Collins, T. J.; Münck, E.; Bominaar, E. L. *Inorg. Chem.* **2008**, *47*, 3669-3678.
